# Supplementary material
Source: PubMed Central journal article supplement (PMC10991451)
Supplement: 262_2020_2747_MOESM1_ESM.pdf [file 262_2020_2747_MOESM1_ESM.pdf]

## Supplementary Figure 1

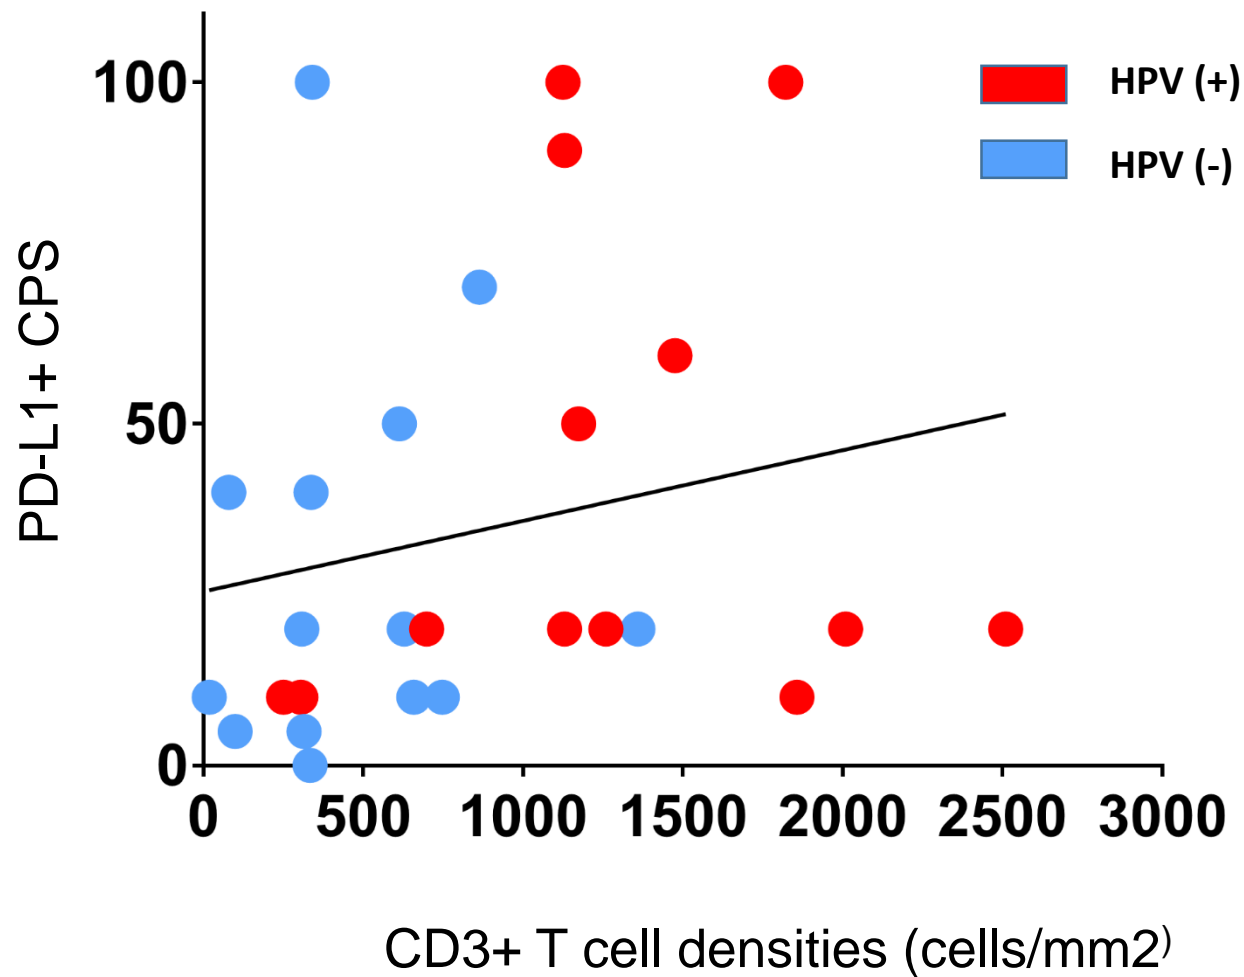

Supplementary Figure 1. PD-L1 expression does not correlate with CD3+ infiltrating T-cell densities, consistent with constitutive tumor cell PD-L1 expression in many HNSCC cases ( $r=0.21$ ,  $p=0.29$ ).
